# Supplementary material for: Nano-Structured Lipid Carrier-Based Oral Glutathione Formulation Mediates Renoprotection against Cyclophosphamide-Induced Nephrotoxicity, and Improves Oral Bioavailability of Glutathione Confirmed through RP-HPLC Micellar Liquid Chromatography
Source: MDPI journal article supplement (doi:10.3390/molecules26247491), 2021-12-10
Supplement: s1 [file s1]

**Table S1:** Intra-Day and Inter-Day Accuracy and Precision for the Determination of GSH by the Proposed HPLC Procedure:

| Analyte | Injected<br>( $\mu\text{g/mL}$ ) | Intra-day                     |                   |                      | Inter-day                     |                   |                      |
|---------|----------------------------------|-------------------------------|-------------------|----------------------|-------------------------------|-------------------|----------------------|
|         |                                  | Found*<br>(Conc. $\pm$<br>SD) | Accuracy<br>(R %) | Precision<br>(RSD %) | Found*<br>(Conc. $\pm$<br>SD) | Accuracy<br>(R %) | Precision<br>(RSD %) |
| GSH     | 5.0                              | 4.96 $\pm$ 0.04               | 99.49             | 0.94                 | 4.98 $\pm$ 0.02               | 99.79             | 0.04                 |
|         | 17.0                             | 17.02 $\pm$ 0.14              | 99.23             | 0.85                 | 16.89 $\pm$ 0.11              | 99.39             | 0.71                 |
|         | 25.0                             | 25.09 $\pm$ 0.36              | 100.62            | 1.44                 | 24.97 $\pm$ 0.35              | 99.88             | 0.14                 |

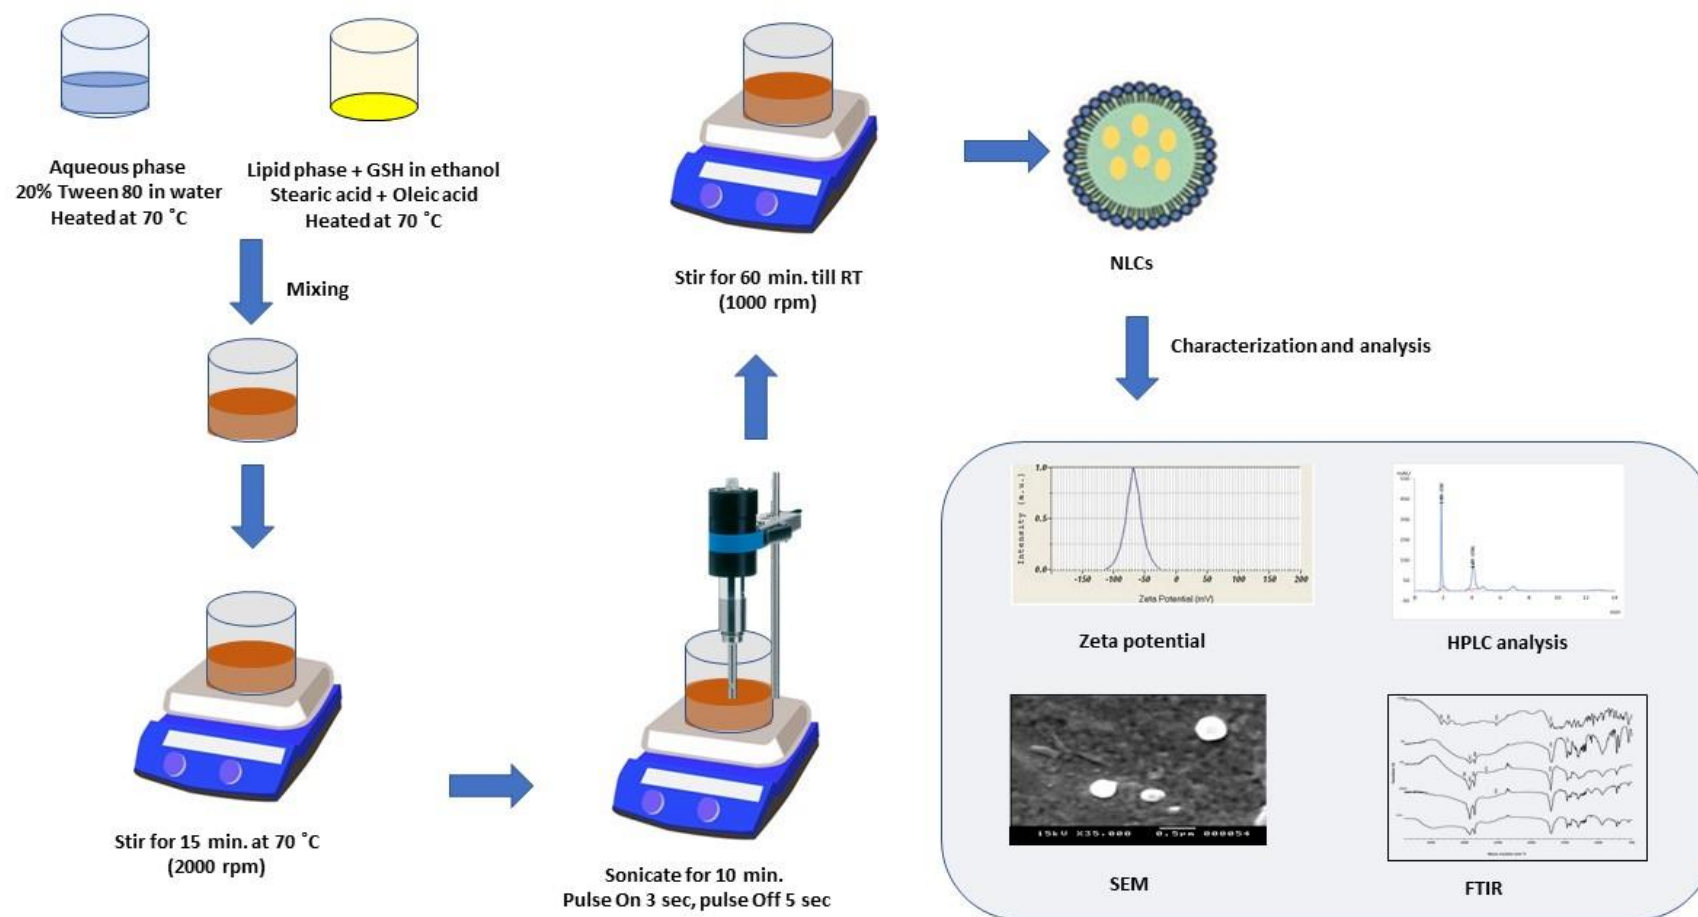

**Figure S1:** Scheme of GSH-NLCs preparation.
